# Supplementary material for: Saliva Is a Valid Alternative to Nasopharyngeal Swab in Chemiluminescence-Based Assay for Detection of SARS-CoV-2 Antigen
Source: PubMed Central journal article supplement (PMC8038133; doi:10.3390/jcm10071471), 2021-04-02
Supplement: jcm-10-01471-s001.pdf [file jcm-10-01471-s001.pdf]

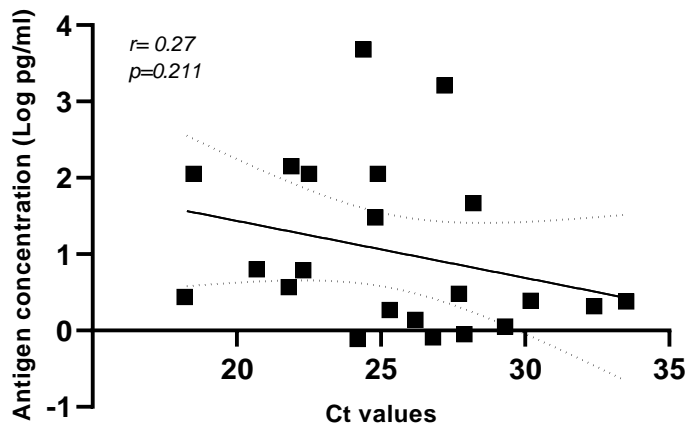

**Supplementary Figure S1.** Correlation between Ag concentration (Log pg/mL) and Ct values on frozen saliva samples
